# Supplementary material for: An electrochemiluminescence amplification strategy: a synergistic effect of electrospun Ru(bpy)32+/CNT/ionic liquid composite nanofibers
Source: Royal Society of Chemistry journal article supplement (doi:10.1039/c4tc01755b), 2014-10-01
Supplement: c4tc01755b1.pdf [file c4tc01755b1.pdf]

## Supporting Information

An electrochemiluminescence amplification strategy: synergistic effect of  
electrospun  $\text{Ru}(\text{bpy})_3^{2+}$ /CNTs/ionic liquid composite nanofibers

*Cuisong Zhou\**, *Jiaojiao Luo*, *Lei Zhang*, *Yuyin Long*, *Congmin Wang*, and *Dan*

*Xiao\**

College of Chemistry, Sichuan University,

Chengdu, 610064, P. R. China

Email: zcs@scu.edu.cn (C.S. Zhou);

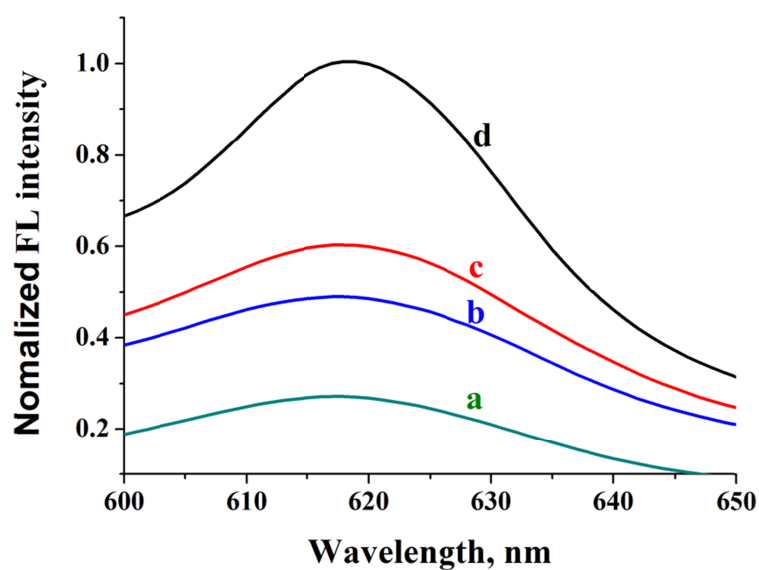

Fig. S1 FL emission spectrum at PAN (a), IL/PAN (b), CNTs/PAN (c) and CNTs/IL/PAN (d) nanofibers modified ITO electrodes in 0.10 M PBS (pH 7.0) containing 1.0 mM TPrA, respectively. (CNTs: 50  $\mu\text{g}/\text{mL}$ , IL: 0.7 v/v %, PAN: 10 wt %,  $\text{Ru}(\text{bpy})_3^{2+}$ : 750  $\mu\text{g}/\text{mL}$ , the

excitation wavelength was recorded at 456 nm.)

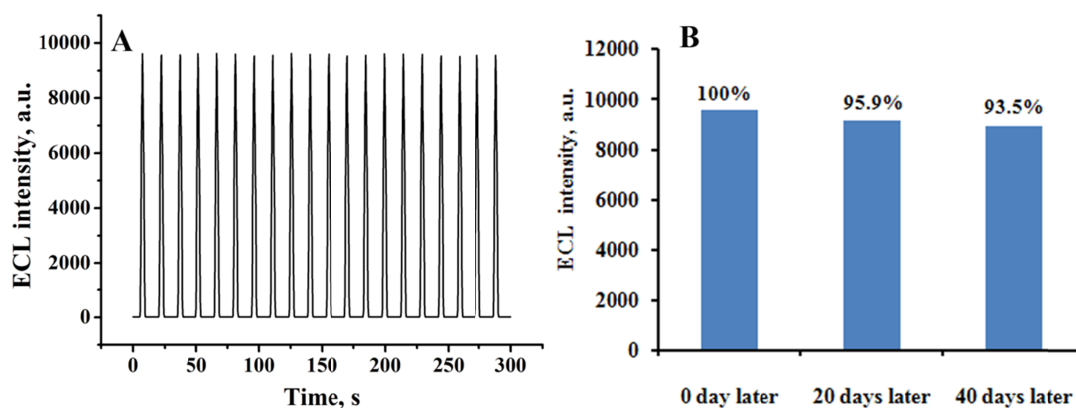

Fig. S2 The ECL intensity-time curve (A) of the CNTs/IL/PAN nanofibers modified ITO electrode in 0.10 M PBS (pH 7.0) with 1.0 mM TPrA under continuous CV scans for 20 cycles. And the ECL intensity (B) of the CNTs/IL/PAN nanofibers modified ITO electrode measured in 0.10 M PBS (pH 7.0) with 1.0 mM TPrA after 20-day storage, 40-day storage, respectively. (CNTs: 50  $\mu\text{g}/\text{mL}$ , IL: 0.7 v/v %, PAN: 10 wt %,  $\text{Ru}(\text{bpy})_3^{2+}$ : 750  $\mu\text{g}/\text{mL}$ )

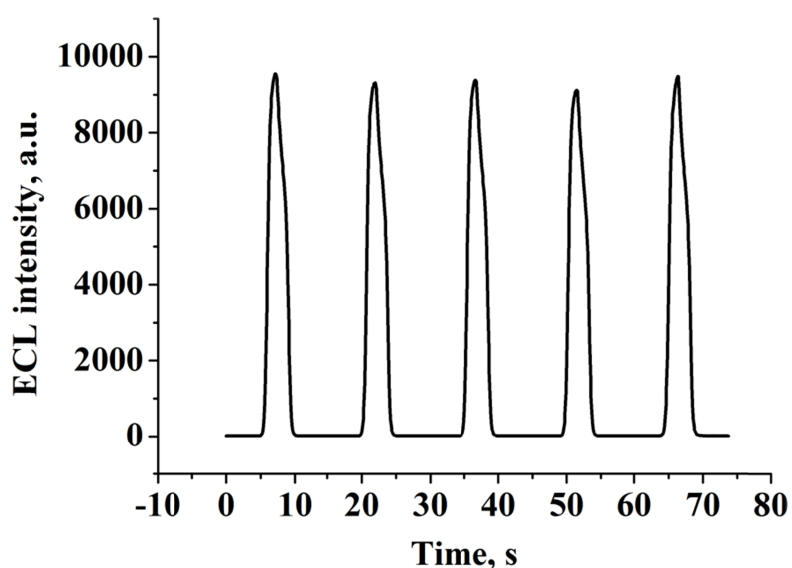

Fig. S3 The reusability of CNTs/IL/PAN nanofibers modified ITO electrode was demonstrated by separately measuring its ECL intensities when it was exposed to five cycles of 0.10 M PBS (pH 7.0) containing 1.0 mM TPrA, respectively. (CNTs: 50  $\mu\text{g}/\text{mL}$ , IL: 0.7 v/v %, PAN: 10 wt %,  $\text{Ru}(\text{bpy})_3^{2+}$ : 750  $\mu\text{g}/\text{mL}$ )

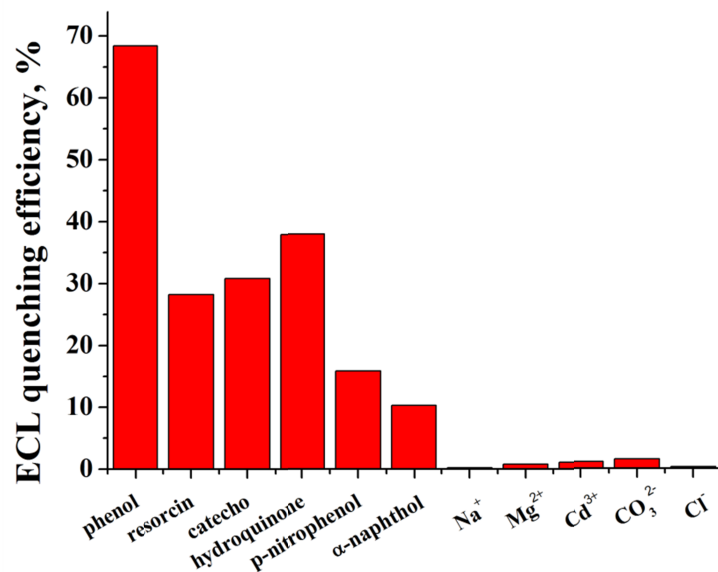

Fig. S4 Comparison of the quenching effects of phenolic compounds (50.0  $\mu\text{M}$ ), and other possible interferents (1.50 mM) on the ECL intensity of CNTs/IL/PAN nanofibers modified ITO electrode in 0.10 M PBS (pH 7.0) containing 1.0 mM TPrA. (CNTs: 50  $\mu\text{g/mL}$ , IL: 0.7 v/v %, PAN: 10 wt %,  $\text{Ru}(\text{bpy})_3^{2+}$ : 750  $\mu\text{g/mL}$ ).

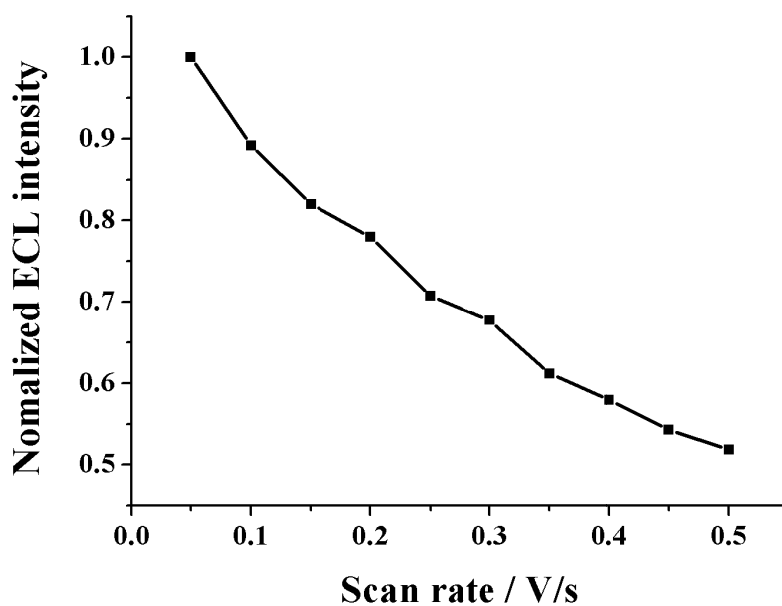

Fig. S5 Effect of scan rate on ECL intensity of the CNTs/IL/PAN nanofibers modified ITO electrode in 0.10 M PBS (pH 7.0) containing 1.0 mM TPrA. (CNTs: 50  $\mu\text{g/mL}$ , IL: 0.7 v/v %, PAN: 10 wt %,  $\text{Ru}(\text{bpy})_3^{2+}$ : 750  $\mu\text{g/mL}$ ).

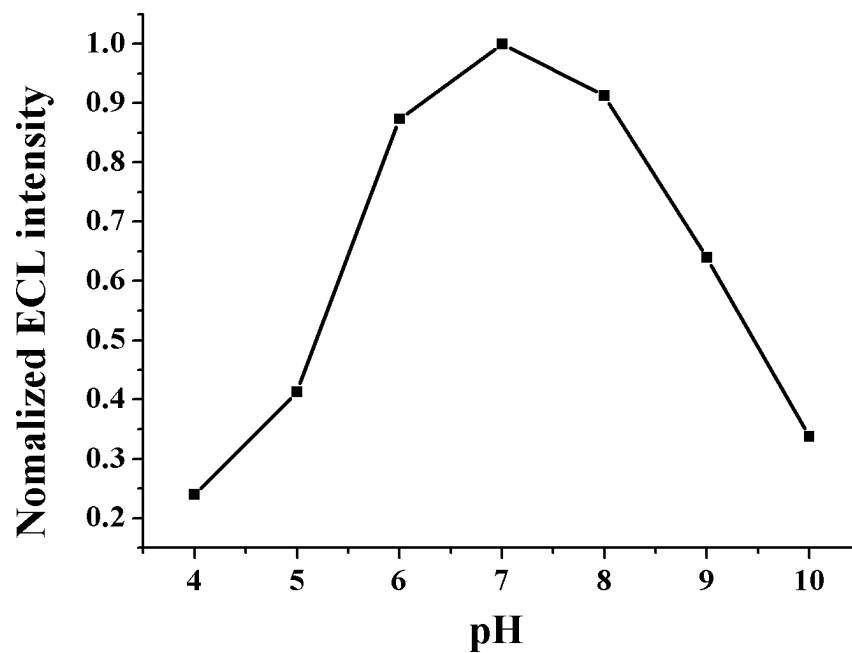

Fig. S6 Effect of pH on ECL signals of the CNTs/IL/PAN nanofibers modified ITO electrode in 0.10 M PBS (pH 7.0) containing 1.0 mM TPrA. (CNTs: 50  $\mu\text{g/mL}$ , IL: 0.7 v/v %, PAN: 10 wt %,  $\text{Ru}(\text{bpy})_3^{2+}$ : 750  $\mu\text{g/mL}$ )

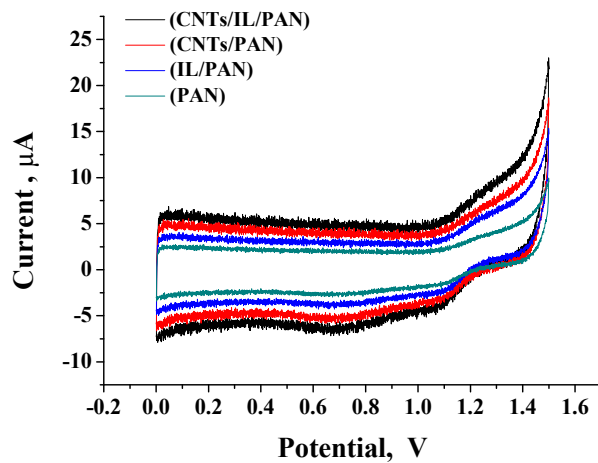

Fig. S7 CV curves correspond to the ECL intensity-potential curves at PAN (a), IL/PAN (b), CNTs/PAN (c) and CNTs/IL/PAN (d) nanofibers modified ITO electrodes in 0.10 M PBS (pH 7.0) containing 1.0 mM TPrA, respectively.

Table S1 Comparison of different nanofibers in electrochemical, luminescence and ECL signals

| Nanofibers <sup>a</sup> | Relative electroactive surface area | Relative luminescence signal | ECL signal amplification |
|-------------------------|-------------------------------------|------------------------------|--------------------------|
| PAN                     | 1.0                                 | 1.0                          | 1.0                      |
| IL/PAN                  | 2.6                                 | 1.8                          | 9.8                      |
| CNTs/PAN                | 3.4                                 | 2.2                          | 13.7                     |
| CNTs/IL/PAN             | 5.4                                 | 3.7                          | 23.4                     |

<sup>a</sup> CNTs: 50 µg/mL, IL: 0.7 v/v%, PAN: 10 wt%, Ru(bpy)<sub>3</sub><sup>2+</sup>: 750 µg/mL
